# Supplementary material for: Receipt of Telehealth Services, Receipt and Retention of Medications for Opioid Use Disorder, and Medically Treated Overdose Among Medicare Beneficiaries Before and During the COVID-19 Pandemic
Source: PubMed Central journal article supplement (PMC9434479; doi:10.1001/jamapsychiatry.2022.2284), 2022-08-31
Supplement: jamapsychiatry-e222284-s001.pdf [file jamapsychiatry-e222284-s001.pdf]

## Supplemental Online Content

Jones CM, Shoff C, Hodges K, et al. Receipt of telehealth services, receipt and retention of medications for opioid use disorder, and medically treated overdose among Medicare beneficiaries before and during the COVID-19 pandemic. *JAMA Psychiatry*. Published online August 31, 2022. doi:10.1001/jamapsychiatry.2022.2284

**eFigure.** Cohort Preindex, Index, and Follow-up Periods for the Prepandemic and Pandemic Cohorts

**eTable 1.** Definitions and Billing Codes Used for OUD, MOUD, Telehealth, Medically Treated Overdose, and Other Conditions and Services Received

**eTable 2.** Characteristics Associated with Receipt of OUD-Related Telehealth Services During Study Period Among Beneficiaries With OUD in the Pandemic Cohort by Dual Eligible Status

**eTable 3.** Characteristics Associated With Receipt of Behavioral Health-Related Telehealth Services During Study Period Among Beneficiaries With OUD in the Pandemic Cohort by Dual Eligible Status

**eTable 4.** Characteristics Associated With MOUD Retention for at Least 80% of Eligible Days During Study Period Among Beneficiaries With OUD in the Pandemic Cohort Receiving MOUD During the Study Period by Dual Eligible Status

**eTable 5.** Characteristics Associated With Experiencing Any Medically Treated Drug Overdose During Study Period Among Beneficiaries With OUD in the Pandemic Cohort by Dual Eligible Status

This supplementary material has been provided by the authors to give readers additional information about their work.

**eFigure.** Cohort Preindex, Index, and Follow-up Periods for the Prepandemic and Pandemic Cohorts

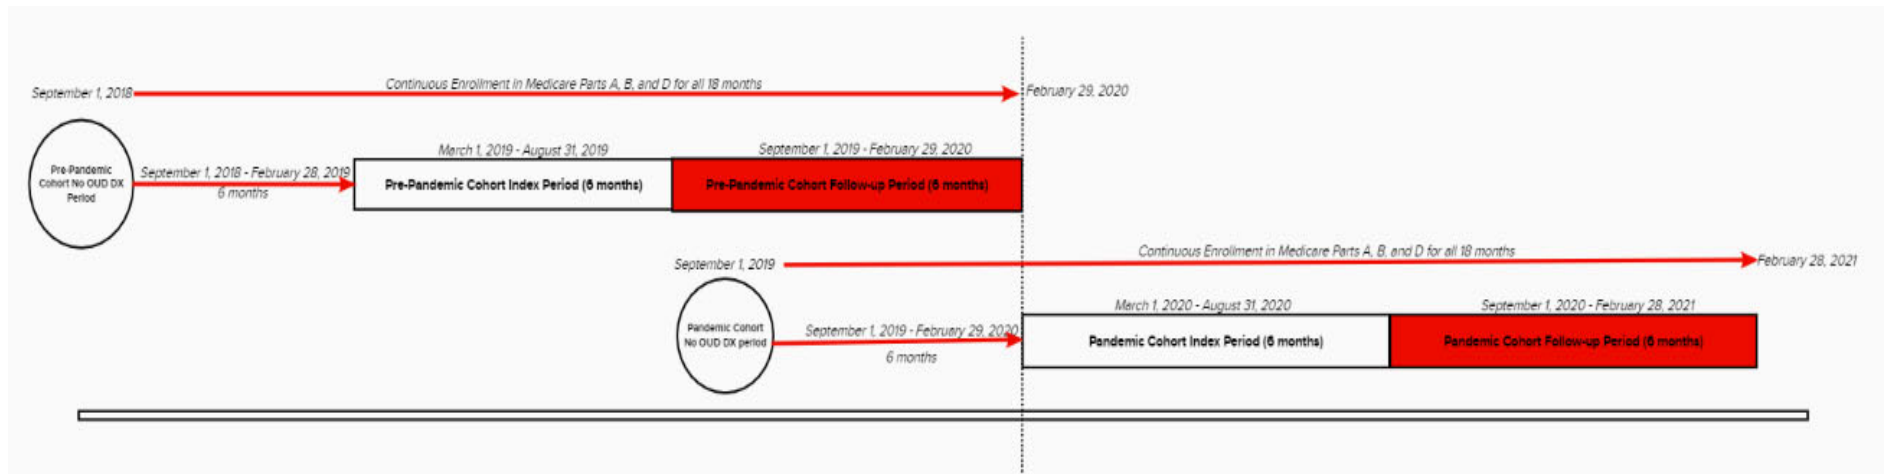

**eTable 1.** Definitions and Billing Codes Used for OUD, MOUD, Telehealth, Medically Treated Overdose, and Other Conditions and Services Received

| Variables                            | Definition                                                                                                                                                                                                                                                                                                                                                                                                                                                                                                                                                                                                                                                                                                                                                                                                                                                                                                                                                                                                                                                                                                                                                                                                                                                                                                                                                                                                                                                                                                                                                                                                                                                                                                                                                                                                                                                                                                                                                                                                                                                                                                                                                                                                                                                                                                                                                                                                                                                                                                                                                                                                                                                                                                                                                                                                                                                                                                                                                                                                                                                                                                                                                                                                                                                                                                                                                                                                                                                                                                          |
|--------------------------------------|---------------------------------------------------------------------------------------------------------------------------------------------------------------------------------------------------------------------------------------------------------------------------------------------------------------------------------------------------------------------------------------------------------------------------------------------------------------------------------------------------------------------------------------------------------------------------------------------------------------------------------------------------------------------------------------------------------------------------------------------------------------------------------------------------------------------------------------------------------------------------------------------------------------------------------------------------------------------------------------------------------------------------------------------------------------------------------------------------------------------------------------------------------------------------------------------------------------------------------------------------------------------------------------------------------------------------------------------------------------------------------------------------------------------------------------------------------------------------------------------------------------------------------------------------------------------------------------------------------------------------------------------------------------------------------------------------------------------------------------------------------------------------------------------------------------------------------------------------------------------------------------------------------------------------------------------------------------------------------------------------------------------------------------------------------------------------------------------------------------------------------------------------------------------------------------------------------------------------------------------------------------------------------------------------------------------------------------------------------------------------------------------------------------------------------------------------------------------------------------------------------------------------------------------------------------------------------------------------------------------------------------------------------------------------------------------------------------------------------------------------------------------------------------------------------------------------------------------------------------------------------------------------------------------------------------------------------------------------------------------------------------------------------------------------------------------------------------------------------------------------------------------------------------------------------------------------------------------------------------------------------------------------------------------------------------------------------------------------------------------------------------------------------------------------------------------------------------------------------------------------------------------|
| <b>Time Spent in Nursing Home</b>    | We considered an individual to be a current nursing home resident on any given day if the most recent assessment was not a discharge assessment and less than 150 days old. An individual without an assessment for 150 days was assumed to be discharged from the facility.                                                                                                                                                                                                                                                                                                                                                                                                                                                                                                                                                                                                                                                                                                                                                                                                                                                                                                                                                                                                                                                                                                                                                                                                                                                                                                                                                                                                                                                                                                                                                                                                                                                                                                                                                                                                                                                                                                                                                                                                                                                                                                                                                                                                                                                                                                                                                                                                                                                                                                                                                                                                                                                                                                                                                                                                                                                                                                                                                                                                                                                                                                                                                                                                                                        |
| <b>Medication Received</b>           | <b>NDCs</b>                                                                                                                                                                                                                                                                                                                                                                                                                                                                                                                                                                                                                                                                                                                                                                                                                                                                                                                                                                                                                                                                                                                                                                                                                                                                                                                                                                                                                                                                                                                                                                                                                                                                                                                                                                                                                                                                                                                                                                                                                                                                                                                                                                                                                                                                                                                                                                                                                                                                                                                                                                                                                                                                                                                                                                                                                                                                                                                                                                                                                                                                                                                                                                                                                                                                                                                                                                                                                                                                                                         |
| <i>Buprenorphine from pharmacies</i> | 59385001201, 59385001230, 59385001401, 59385001430, 59385001601, 59385001630, 00093365640, 00093365740, 00093365840, 00093365940, 42858035340, 42858049340, 42858050103, 42858050203, 42858058640, 42858075040, 42858083940, 55700057904, 58118315608, 60687048121, 60687049221, 62756045964, 62756045983, 62756046064, 62756046083, 67046099430, 67046099530, 70518071100, 70518071101, 70518071102, 70518155700, 70518162500, 70518221700, 70518221800, 71335035301, 71335035302, 71335035303, 71335035304, 71335035305, 71335035306, 71335035307, 71335095001, 71335095002, 71335095003, 71335095004, 71335095005, 71335095006, 71335095007, 71335115401, 71335115402, 71335115403, 71335115404, 71335115405, 71335115406, 71335115407, 71335115408, 71335115409, 55700056804, 00093360040, 00093360140, 00093360240, 00093360340, 67046099230, 67046099330, 60846097003, 60846097103, 63629727001, 63629727002, 67046099830, 67046099930, 00054017613, 00054017713, 00074201201, 00093537856, 00093537956, 00143924605, 00228315303, 00228315603, 00378092393, 00378092493, 00409201232, 21695051510, 35356055530, 35356055630, 40042001001, 42023017901, 42023017905, 43063066706, 50383092493, 50383093093, 54569657800, 55390010010, 55700030230, 55700030330, 58118017608, 58118017708, 63629712601, 63629712602, 63629712603, 63629712604, 63629712605, 63629712606, 63629712607, 63629712608, 63629712609, 68258299103, 68308020230, 68308020830, 70518044200, 70518201400, 70518221600, 70518222600, 71335116301, 71335116302, 71335116303, 71335116304, 71335116305, 71335116306, 71335116307, 71335116308, 71335116309, 67046099030, 67046099130, 64725093003, 64725192403, 63629712501, 63629712502, 63629712503, 63629712504, 63629712505, 63629712506, 63629712507, 69189059101, 67046099630, 67046099730, 70518065200, 70518065201, 70518065202, 00054018813, 00054018913, 00093572056, 00093572156, 00228315403, 00228315473, 00228315503, 00228315573, 00378876793, 00378876893, 00406192303, 00406192403, 00406800503, 00406802003, 00781721664, 00781722764, 00781723864, 00781724964, 42291017430, 42291017530, 43598057930, 43598058030, 43598058130, 43598058230, 47781035503, 47781035603, 47781035703, 50268014415, 50268014515, 50383028793, 50383029493, 52427069203, 52427069403, 52427069803, 52427071203, 53217013830, 54569640800, 55700018430, 60429058630, 60429058730, 62175045232, 62175045832, 62756096964, 62756096983, 62756097064, 62756097083, 65162041503, 65162041509, 65162041603, 65162041609, 70518100700, 70518168400, 70518231100, 70518232700, 71335129601, 71335129602, 71335137801, 58284010014, 52440010014, 12496010001, 12496030001, 00490005100, 00490005130, 00490005160, 00490005190, 12496120201, 12496120203, 12496120401, 12496120403, 12496120801, 12496120803, 12496121201, 12496121203, 12496128302, 12496130602, 16590066605, 16590066630, 16590066705, 16590066730, 16590066790, 23490927003, 23490927006, 23490927009, 35356000407, 35356000430, 43063018407, 43063018430, 49999039507, 49999039515, 49999039530, 52959030430, 52959074930, 54569549600, 54569573900, 54569573901, 54569573902, 54569639900, 54868570700, 54868570701, 54868570702, 54868570703, 54868570704, 54868575000, 55045378403, 55700014730, 55887031204, 55887031215, 63629403401, 63629403402, 63629403403, 63874108403, 63874108503, 66336001530, 66336001630, 68071138003, 68071151003, 68258299903, 12496127802, 12496131002, 49999063830, 49999063930, 63629409201, |

|                                                   |                                                                                                                                                                                                                                                                                                                                                                                                                                                                                                                                                                                                                                                                                                                                                                                                                                                                                                                                                                                                                                                                                                                                                                                                                                                                                                                                                                                                                                                                                                                                                                                                                                                                                                                                                                                                                                                                                                                                                                                                                                                                                                                                                                                                                                                                                                                                                                                                                                                                                                                                                                                                                                                                                                                                                                                                                                                                                                                                                                                                                                                                                                                                                                                                                                                                                                                                                                                                                                                                |
|---------------------------------------------------|----------------------------------------------------------------------------------------------------------------------------------------------------------------------------------------------------------------------------------------------------------------------------------------------------------------------------------------------------------------------------------------------------------------------------------------------------------------------------------------------------------------------------------------------------------------------------------------------------------------------------------------------------------------------------------------------------------------------------------------------------------------------------------------------------------------------------------------------------------------------------------------------------------------------------------------------------------------------------------------------------------------------------------------------------------------------------------------------------------------------------------------------------------------------------------------------------------------------------------------------------------------------------------------------------------------------------------------------------------------------------------------------------------------------------------------------------------------------------------------------------------------------------------------------------------------------------------------------------------------------------------------------------------------------------------------------------------------------------------------------------------------------------------------------------------------------------------------------------------------------------------------------------------------------------------------------------------------------------------------------------------------------------------------------------------------------------------------------------------------------------------------------------------------------------------------------------------------------------------------------------------------------------------------------------------------------------------------------------------------------------------------------------------------------------------------------------------------------------------------------------------------------------------------------------------------------------------------------------------------------------------------------------------------------------------------------------------------------------------------------------------------------------------------------------------------------------------------------------------------------------------------------------------------------------------------------------------------------------------------------------------------------------------------------------------------------------------------------------------------------------------------------------------------------------------------------------------------------------------------------------------------------------------------------------------------------------------------------------------------------------------------------------------------------------------------------------------------|
|                                                   | 63874117303, 63874117403, 54123011430, 54123090730, 54123091430, 54123092930, 54123095730, 54123098630, 00228315567, 00378876716, 00378876816, 00781721606, 00781722706, 00781723806, 00781724906, 12496010002, 12496010005, 12496030002, 12496030005, 43063075306, 43598057901, 43598058001, 43598058101, 43598058201, 47781035511, 47781035611, 47781035711, 47781035811, 50090292400, 50268014411, 50268014511, 52427069211, 52427069411, 52427069811, 52427071211, 53217024630, 60429058611, 60429058633, 60429058711, 60429058733.                                                                                                                                                                                                                                                                                                                                                                                                                                                                                                                                                                                                                                                                                                                                                                                                                                                                                                                                                                                                                                                                                                                                                                                                                                                                                                                                                                                                                                                                                                                                                                                                                                                                                                                                                                                                                                                                                                                                                                                                                                                                                                                                                                                                                                                                                                                                                                                                                                                                                                                                                                                                                                                                                                                                                                                                                                                                                                                        |
| <i>ER naltrexone from pharmacies</i>              | NDCs: 00406009203, 43063046915, 52125072702, 63459030042, 63629530402, 65757030001                                                                                                                                                                                                                                                                                                                                                                                                                                                                                                                                                                                                                                                                                                                                                                                                                                                                                                                                                                                                                                                                                                                                                                                                                                                                                                                                                                                                                                                                                                                                                                                                                                                                                                                                                                                                                                                                                                                                                                                                                                                                                                                                                                                                                                                                                                                                                                                                                                                                                                                                                                                                                                                                                                                                                                                                                                                                                                                                                                                                                                                                                                                                                                                                                                                                                                                                                                             |
| <i>Methadone from OTPs</i>                        | HCPCS: G2067, G2078                                                                                                                                                                                                                                                                                                                                                                                                                                                                                                                                                                                                                                                                                                                                                                                                                                                                                                                                                                                                                                                                                                                                                                                                                                                                                                                                                                                                                                                                                                                                                                                                                                                                                                                                                                                                                                                                                                                                                                                                                                                                                                                                                                                                                                                                                                                                                                                                                                                                                                                                                                                                                                                                                                                                                                                                                                                                                                                                                                                                                                                                                                                                                                                                                                                                                                                                                                                                                                            |
| <i>Buprenorphine from OTPs</i>                    | HCPCS: G2068, G2069, G2070, G2071, G2072, G2079                                                                                                                                                                                                                                                                                                                                                                                                                                                                                                                                                                                                                                                                                                                                                                                                                                                                                                                                                                                                                                                                                                                                                                                                                                                                                                                                                                                                                                                                                                                                                                                                                                                                                                                                                                                                                                                                                                                                                                                                                                                                                                                                                                                                                                                                                                                                                                                                                                                                                                                                                                                                                                                                                                                                                                                                                                                                                                                                                                                                                                                                                                                                                                                                                                                                                                                                                                                                                |
| <i>ER naltrexone from OTPs</i>                    | HCPCS: G2073                                                                                                                                                                                                                                                                                                                                                                                                                                                                                                                                                                                                                                                                                                                                                                                                                                                                                                                                                                                                                                                                                                                                                                                                                                                                                                                                                                                                                                                                                                                                                                                                                                                                                                                                                                                                                                                                                                                                                                                                                                                                                                                                                                                                                                                                                                                                                                                                                                                                                                                                                                                                                                                                                                                                                                                                                                                                                                                                                                                                                                                                                                                                                                                                                                                                                                                                                                                                                                                   |
| <b>ODU and Behavioral Health-Related Services</b> | <b>ICD-10 CM Diagnosis Codes on Part A or B Service Claim</b>                                                                                                                                                                                                                                                                                                                                                                                                                                                                                                                                                                                                                                                                                                                                                                                                                                                                                                                                                                                                                                                                                                                                                                                                                                                                                                                                                                                                                                                                                                                                                                                                                                                                                                                                                                                                                                                                                                                                                                                                                                                                                                                                                                                                                                                                                                                                                                                                                                                                                                                                                                                                                                                                                                                                                                                                                                                                                                                                                                                                                                                                                                                                                                                                                                                                                                                                                                                                  |
| <i>ODU-Related Services</i>                       | F1110, F1111, F11120, F11121x, F1114, F1115x, F1118x, F1119, F112x F1122x, F1123, F1124, F1125x, F1128x, F1129                                                                                                                                                                                                                                                                                                                                                                                                                                                                                                                                                                                                                                                                                                                                                                                                                                                                                                                                                                                                                                                                                                                                                                                                                                                                                                                                                                                                                                                                                                                                                                                                                                                                                                                                                                                                                                                                                                                                                                                                                                                                                                                                                                                                                                                                                                                                                                                                                                                                                                                                                                                                                                                                                                                                                                                                                                                                                                                                                                                                                                                                                                                                                                                                                                                                                                                                                 |
| <i>Behavioral Health-Related Services</i>         | F060, F061, F062, F0630, F0631, F0632, F0633, F0634, F064, F068, F09, F1010, F10120, F10121, F10129, F1014, F10150, F10151, F10159, F10180, F10181, F10182, F10188, F1019, F1020, F10220, F10221, F10229, F10230, F10231, F10232, F10239, F1024, F10250, F10251, F10259, F1026, F1027, F10280, F10281, F10282, F10288, F1029, F10920, F10921, F10929, F1094, F10950, F10951, F10959, F1096, F1097, F10980, F10981, F10982, F10988, F1099, F1110, F11120, F11121, F11122, F11129, F1114, F11150, F11151, F11159, F11181, F11182, F11188, F1119, F1120, F11220, F11221, F11222, F11229, F1123, F1124, F11250, F11251, F11259, F11281, F11282, F11288, F1129, F1210, F12120, F12121, F12122, F12129, F12150, F12151, F12159, F12180, F12188, F1219, F1220, F12220, F12221, F12222, F12229, F12250, F12251, F12259, F12280, F12288, F1229, F1290, F12920, F12921, F12922, F12929, F12950, F12951, F12959, F12980, F12988, F1299, F1310, F13120, F13121, F13129, F1314, F13150, F13151, F13159, F13180, F13181, F13182, F13188, F1319, F1320, F13220, F13221, F13229, F13230, F13231, F13232, F13239, F1324, F13250, F13251, F13259, F1326, F1327, F13280, F13281, F13282, F13288, F1329, F1390, F13920, F13921, F13929, F13930, F13931, F13932, F13939, F1394, F13950, F13951, F13959, F1396, F1397, F13980, F13981, F13982, F13988, F1399, F1410, F14120, F14121, F14122, F14129, F1414, F14150, F14151, F14159, F14180, F14181, F14182, F14188, F1419, F1420, F14220, F14221, F14222, F14229, F1423, F1424, F14250, F14251, F14259, F14280, F14281, F14282, F14288, F1429, F1490, F14920, F14921, F14922, F14929, F1494, F14950, F14951, F14959, F14980, F14981, F14982, F14988, F1499, F1510, F15120, F15121, F15122, F15129, F1514, F15150, F15151, F15159, F15180, F15181, F15182, F15188, F1519, F1520, F15220, F15221, F15222, F15229, F1523, F1524, F15250, F15251, F15259, F15280, F15281, F15282, F15288, F1529, F1590, F15920, F15921, F15922, F15929, F1593, F1594, F15950, F15951, F15959, F15980, F15981, F15982, F15988, F1599, F1610, F16120, F16121, F16122, F16129, F1614, F16150, F16151, F16159, F16180, F16183, F16188, F1619, F1620, F16220, F16221, F16229, F1624, F16251, F16259, F16280, F16283, F16288, F1629, F1650, F1690, F16920, F16921, F16929, F1694, F16950, F16951, F16959, F16980, F16983, F16988, F1699, F17200, F17201, F17203, F17208, F17209, F17210, F17211, F17213, F17218, F17219, F17220, F17221, F17223, F17228, F17229, F17290, F17291, F17293, F17298, F17299, F1810, F18120, F18121, F18129, F1814, F18150, F18151, F18159, F1817, F18180, F18188, F1819, F1820, F18220, F18221, F18229, F1824, F18250, F18251, F18259, F1827, F18280, F18288, F1829, F1890, F18920, F18921, F18929, F1894, F18950, F18951, F18959, F1897, F18980, F18988, F1899, F1910, F19120, F19121, F19122, F19129, F1914, F19150, F19151, F19159, F1916, F1917, F19180, F19181, F19182, F19188, F1919, F1920, F19220, F19221, F19222, F19229, F19230, F19231, F19232, F19239, F1924, F19250, F19251, F19259, F1926, F1927, F19280, F19281, F19282, F19288, F1929, F1990, F19920, F19921, F19922, F19929, F19930, F19931, F19932, F19939, F1994, F19950, F19951, F19959, F1996, F1997, F19980, F19981, F19982, F19988, F1999, F200, F201, F202, F203, F205, F2081, F2089, F209, F21, F22, F23, F24, F250, F251, F258, F259, F28, F29, F3010, F3011, F3012, F3013, F302, F303, F304, F308, F309, F310, F3110, F3111, F3112, F3113, F312, F3130, |

|                                           |                                                                                                                                                                                                                                                                                                                                                                                                                                                                                                                                                                                                                                                                                                                                                                                                                                                                                                                                                                                                                                                                                                                                               |
|-------------------------------------------|-----------------------------------------------------------------------------------------------------------------------------------------------------------------------------------------------------------------------------------------------------------------------------------------------------------------------------------------------------------------------------------------------------------------------------------------------------------------------------------------------------------------------------------------------------------------------------------------------------------------------------------------------------------------------------------------------------------------------------------------------------------------------------------------------------------------------------------------------------------------------------------------------------------------------------------------------------------------------------------------------------------------------------------------------------------------------------------------------------------------------------------------------|
|                                           | F3131, F3132, F314, F315, F3160, F3161, F3162, F3163, F3164, F3170, F3171, F3172, F3173, F3174, F3175, F3176, F3177, F3178, F3181, F3189, F319, F320, F321, F322, F323, F324, F325, F328, F3289, F329, F330, F331, F332, F333, F3340, F3341, F3342, F338, F339, F340, F341, F348, F3481, F3489, F349, F39, F4000, F4001, F4002, F4010, F4011, F40210, F40218, F40220, F40228, F40230, F40231, F40232, F40233, F40240, F40241, F40242, F40243, F40248, F40290, F40291, F40298, F408, F409, F410, F411, F413, F418, F419, F42, F422, F423, F424, F428, F429, F430, F4310, F4311, F4312, F4320, F4321, F4322, F4323, F4324, F4325, F4329, F438, F439, F440, F441, F442, F444, F445, F446, F447, F4481, F4489, F449, F450, F451, F4520, F4521, F4522, F4529, F4541, F4542, F458, F459, F488, F489, F5000, F5001, F5002, F502, F508, F509, F53, F54, F59, F600, F601, F602, F603, F604, F605, F606, F607, F6081, F6089, F609, F630, F631, F632, F633, F6381, F6389, F639, F641, F642, F648, F649, F6810, F6811, F6812, F6813, F688, F69, F900, F901, F902, F908, F909, F910, F911, F912, F913, F918, F919, F930, F938, F939, F983, F988, F989, F99 |
| <b>Telehealth Services</b>                | Only services that are on the Medicare telehealth services list are classified as telehealth eligible and those HCPCS codes billed with the POS = “02” or “95”, “GT”, “GQ”, or “GO” modifiers are considered delivered via a telecommunication system and not in-person. Virtual check-ins were identified using HCPCS codes G2010, G2012 or G0071, as reported by the health care professional on the Part B Claim. E-visits were identified using the CPT codes 99421-99423 or HCPCS codes G2061-G2063, as reported by the rendering health care professional on the Part B Claim.                                                                                                                                                                                                                                                                                                                                                                                                                                                                                                                                                          |
| <b>Medically Treated Drug Overdose</b>    | ICD-10 CM Diagnosis Codes: T36-T50                                                                                                                                                                                                                                                                                                                                                                                                                                                                                                                                                                                                                                                                                                                                                                                                                                                                                                                                                                                                                                                                                                            |
| <b>Co-occurring conditions</b>            | <b>ICD-10 CM Diagnosis Codes</b>                                                                                                                                                                                                                                                                                                                                                                                                                                                                                                                                                                                                                                                                                                                                                                                                                                                                                                                                                                                                                                                                                                              |
| <i>Substance use disorder</i>             |                                                                                                                                                                                                                                                                                                                                                                                                                                                                                                                                                                                                                                                                                                                                                                                                                                                                                                                                                                                                                                                                                                                                               |
| Alcohol use disorder                      | F101X, F102X, F109X                                                                                                                                                                                                                                                                                                                                                                                                                                                                                                                                                                                                                                                                                                                                                                                                                                                                                                                                                                                                                                                                                                                           |
| Tobacco use disorder                      | F17                                                                                                                                                                                                                                                                                                                                                                                                                                                                                                                                                                                                                                                                                                                                                                                                                                                                                                                                                                                                                                                                                                                                           |
| Cannabis use disorder                     | F121X, F122X, F129X                                                                                                                                                                                                                                                                                                                                                                                                                                                                                                                                                                                                                                                                                                                                                                                                                                                                                                                                                                                                                                                                                                                           |
| Cocaine use disorder                      | F141X, F142X, F149X                                                                                                                                                                                                                                                                                                                                                                                                                                                                                                                                                                                                                                                                                                                                                                                                                                                                                                                                                                                                                                                                                                                           |
| Sedative/hypnotic use disorder            | F131X, F132X, F139X                                                                                                                                                                                                                                                                                                                                                                                                                                                                                                                                                                                                                                                                                                                                                                                                                                                                                                                                                                                                                                                                                                                           |
| Stimulant use disorder                    | F151X, F152X, F159X                                                                                                                                                                                                                                                                                                                                                                                                                                                                                                                                                                                                                                                                                                                                                                                                                                                                                                                                                                                                                                                                                                                           |
| Other psychoactive substance use disorder | F161X, F162X, F169X, F181X, F182X, F189X, F191X, F192X, F199X                                                                                                                                                                                                                                                                                                                                                                                                                                                                                                                                                                                                                                                                                                                                                                                                                                                                                                                                                                                                                                                                                 |
| <i>Mental health diagnosis</i>            | <b>CMS Chronic Condition Warehouse (CCW) Flags:</b><br><a href="https://www2.ccwdata.org/web/guest/condition-categories">https://www2.ccwdata.org/web/guest/condition-categories</a>                                                                                                                                                                                                                                                                                                                                                                                                                                                                                                                                                                                                                                                                                                                                                                                                                                                                                                                                                          |
| Anxiety                                   | Anxiety Disorders CCW Flag                                                                                                                                                                                                                                                                                                                                                                                                                                                                                                                                                                                                                                                                                                                                                                                                                                                                                                                                                                                                                                                                                                                    |
| Bipolar disorder                          | Bipolar Disorder CCW Flag                                                                                                                                                                                                                                                                                                                                                                                                                                                                                                                                                                                                                                                                                                                                                                                                                                                                                                                                                                                                                                                                                                                     |
| Major depression                          | Depression CCW Flag                                                                                                                                                                                                                                                                                                                                                                                                                                                                                                                                                                                                                                                                                                                                                                                                                                                                                                                                                                                                                                                                                                                           |
| Personality disorder                      | Personality Disorders CCW Flag                                                                                                                                                                                                                                                                                                                                                                                                                                                                                                                                                                                                                                                                                                                                                                                                                                                                                                                                                                                                                                                                                                                |
| Attention deficit hyperactivity Disorder  | ADHD, Conduct Disorders, and Hyperkinetic Syndrome CCW Flag                                                                                                                                                                                                                                                                                                                                                                                                                                                                                                                                                                                                                                                                                                                                                                                                                                                                                                                                                                                                                                                                                   |
| Post-traumatic stress disorder            | Post-Traumatic Stress Disorder CCW Flag                                                                                                                                                                                                                                                                                                                                                                                                                                                                                                                                                                                                                                                                                                                                                                                                                                                                                                                                                                                                                                                                                                       |
| Schizophrenia or other psychotic disorder | Schizophrenia and Other Psychotic Disorders CCW Flag                                                                                                                                                                                                                                                                                                                                                                                                                                                                                                                                                                                                                                                                                                                                                                                                                                                                                                                                                                                                                                                                                          |
| <i>Chronic medical conditions</i>         |                                                                                                                                                                                                                                                                                                                                                                                                                                                                                                                                                                                                                                                                                                                                                                                                                                                                                                                                                                                                                                                                                                                                               |
| Cancer                                    | CCW Flags for: Breast Cancer, Colorectal Cancer, Endometrial Cancer, Lung Cancer, Prostate Cancer, Leukemias and Lymphomas                                                                                                                                                                                                                                                                                                                                                                                                                                                                                                                                                                                                                                                                                                                                                                                                                                                                                                                                                                                                                    |
| Diabetes                                  | Diabetes CCW Flag                                                                                                                                                                                                                                                                                                                                                                                                                                                                                                                                                                                                                                                                                                                                                                                                                                                                                                                                                                                                                                                                                                                             |
| Cardiovascular and other circulatory      | CCW Flags for: Atrial Fibrillation, Acute Myocardial Infarction, Ischemic Heart Disease, Heart Failure, Hypertension                                                                                                                                                                                                                                                                                                                                                                                                                                                                                                                                                                                                                                                                                                                                                                                                                                                                                                                                                                                                                          |
| Chronic respiratory disease               | CCW Flags for: Asthma, Chronic Obstructive Pulmonary Disease, Bronchiectasis                                                                                                                                                                                                                                                                                                                                                                                                                                                                                                                                                                                                                                                                                                                                                                                                                                                                                                                                                                                                                                                                  |
| Viral hepatitis                           | Viral Hepatitis CCW Flag                                                                                                                                                                                                                                                                                                                                                                                                                                                                                                                                                                                                                                                                                                                                                                                                                                                                                                                                                                                                                                                                                                                      |
| HIV                                       | HIV/AIDS CCW Flag                                                                                                                                                                                                                                                                                                                                                                                                                                                                                                                                                                                                                                                                                                                                                                                                                                                                                                                                                                                                                                                                                                                             |

|                                                                           |                                                                                                                                                                                                                                                       |
|---------------------------------------------------------------------------|-------------------------------------------------------------------------------------------------------------------------------------------------------------------------------------------------------------------------------------------------------|
| Obesity                                                                   | Obesity CCW Flag                                                                                                                                                                                                                                      |
| Liver disease, cirrhosis, and other liver conditions, excluding hepatitis | CCW Flags for: Liver Disease, Cirrhosis, and Other Liver Conditions (excluding Hepatitis)                                                                                                                                                             |
| Acute/chronic pain                                                        | CCW Flags for: Migraine and Chronic Headache, Fibromyalgia and Chronic Pain and Fatigue, Rheumatoid Arthritis/Osteoarthritis, Multiple Sclerosis and Transverse Myelitis, Sickle Cell Disease, Spinal Cord Injury, Pressure Ulcers and Chronic Ulcers |

**eTable 2.** Characteristics Associated with Receipt of OUD-Related Telehealth Services During Study Period Among Beneficiaries With OUD in the Pandemic Cohort by Dual Eligible Status

|                                                                 | <b>Dually Eligible Beneficiaries<br/>N=36,724</b> | <b>Non-Dually Eligible Beneficiaries<br/>N=33,773</b> |
|-----------------------------------------------------------------|---------------------------------------------------|-------------------------------------------------------|
|                                                                 | <b>Adjusted ORs<sup>†</sup><br/>(95% CI)</b>      | <b>Adjusted ORs<sup>†</sup><br/>(95% CI)</b>          |
| <b>Receipt of MOUD During Study Period</b>                      |                                                   |                                                       |
| No MOUD                                                         | Ref                                               | Ref                                                   |
| MOUD from OTP only                                              | <b>0.379 (0.323, 0.444)</b>                       | <b>0.270 (0.182, 0.400)</b>                           |
| MOUD from OTP and Pharmacy                                      | <b>3.318 (2.342, 4.700)</b>                       | <b>4.835 (1.911, 12.235)</b>                          |
| ER Naltrexone from Pharmacy only                                | <b>1.646 (1.132, 2.393)</b>                       | 0.633 (0.141, 2.842)                                  |
| Buprenorphine from Pharmacy only                                | <b>4.115 (3.818, 4.437)</b>                       | <b>2.820 (2.547, 3.122)</b>                           |
| <b>Baseline Sex</b>                                             |                                                   |                                                       |
| Male                                                            | Ref                                               | Ref                                                   |
| Female                                                          | <b>1.090 (1.028, 1.156)</b>                       | <b>1.097 (1.034, 1.164)</b>                           |
| <b>Baseline Age Group</b>                                       |                                                   |                                                       |
| 18-44                                                           | Ref                                               | Ref                                                   |
| 45-64                                                           | 0.966 (0.893, 1.044)                              | 0.880 (0.729, 1.062)                                  |
| 65-74                                                           | 0.993 (0.902, 1.093)                              | <b>0.798 (0.662, 0.963)</b>                           |
| 75 or older                                                     | 1.097 (0.974, 1.235)                              | <b>0.744 (0.613, 0.903)</b>                           |
| <b>Baseline Race/Ethnicity</b>                                  |                                                   |                                                       |
| Non-Hispanic White                                              | Ref                                               | Ref                                                   |
| Non-Hispanic African American                                   | 0.938 (0.863, 1.018)                              | 0.917 (0.798, 1.053)                                  |
| Non-Hispanic American Indian or Alaska Native                   | 1.140 (0.912, 1.425)                              | 0.853 (0.566, 1.286)                                  |
| Non-Hispanic Asian or Pacific Islander                          | <b>1.460 (1.177, 1.810)</b>                       | 0.791 (0.549, 1.140)                                  |
| Non-Hispanic Other                                              | 1.180 (0.821, 1.697)                              | 0.872 (0.599, 1.270)                                  |
| Hispanic                                                        | 1.037 (0.942, 1.142)                              | 0.962 (0.818, 1.131)                                  |
| <b>Baseline U.S Census Region</b>                               |                                                   |                                                       |
| Northeast                                                       | Ref                                               | Ref                                                   |
| Midwest                                                         | 0.893 (0.673, 1.185)                              | 0.731 (0.518, 1.033)                                  |
| South                                                           | <b>0.662 (0.510, 0.858)</b>                       | <b>0.672 (0.488, 0.924)</b>                           |
| West                                                            | 0.836 (0.632, 1.105)                              | 0.877 (0.625, 1.232)                                  |
| <b>Baseline County Urban-Rural Status</b>                       |                                                   |                                                       |
| Metropolitan                                                    | Ref                                               | Ref                                                   |
| Micropolitan                                                    | 0.968 (0.900, 1.041)                              | 0.938 (0.867, 1.015)                                  |
| Rural                                                           | 0.981 (0.817, 1.177)                              | 0.898 (0.726, 1.112)                                  |
| <b>Time Spent in Nursing Home from Baseline to End of Study</b> |                                                   |                                                       |
| No time                                                         | Ref                                               | Ref                                                   |
| Quantile 1                                                      | <b>0.608 (0.503, 0.734)</b>                       | <b>0.613 (0.506, 0.742)</b>                           |
| Quantile 2                                                      | <b>0.672 (0.554, 0.816)</b>                       | <b>0.671 (0.561, 0.802)</b>                           |
| Quantile 3                                                      | <b>0.572 (0.478, 0.684)</b>                       | <b>0.636 (0.519, 0.779)</b>                           |
| Quantile 4                                                      | <b>0.625 (0.543, 0.718)</b>                       | 0.830 (0.576, 1.196)                                  |
| <b>Baseline Other Substance Use Disorder Diagnosis*</b>         |                                                   |                                                       |

|                                                                                                                                                                                                                                                     |                             |                             |
|-----------------------------------------------------------------------------------------------------------------------------------------------------------------------------------------------------------------------------------------------------|-----------------------------|-----------------------------|
| Alcohol use disorder                                                                                                                                                                                                                                | 0.957 (0.878, 1.042)        | 0.911 (0.813, 1.021)        |
| Tobacco use disorder                                                                                                                                                                                                                                | <b>0.876 (0.824, 0.930)</b> | <b>0.915 (0.848, 0.987)</b> |
| Cannabis use disorder                                                                                                                                                                                                                               | <b>0.887 (0.805, 0.977)</b> | 0.836 (0.697, 1.002)        |
| Cocaine use disorder                                                                                                                                                                                                                                | 1.000 (0.886, 1.129)        | <b>0.670 (0.482, 0.932)</b> |
| Stimulant use disorder                                                                                                                                                                                                                              | 0.908 (0.811, 1.016)        | 0.772 (0.591, 1.008)        |
| Sedative/hypnotic disorder                                                                                                                                                                                                                          | <b>1.518 (1.374, 1.677)</b> | <b>1.604 (1.440, 1.787)</b> |
| Other psychoactive substance use disorder                                                                                                                                                                                                           | <b>0.785 (0.720, 0.856)</b> | <b>0.748 (0.649, 0.863)</b> |
| <b>Baseline Mental Health Diagnosis*</b>                                                                                                                                                                                                            |                             |                             |
| Anxiety                                                                                                                                                                                                                                             | 1.027 (0.962, 1.097)        | 0.948 (0.890, 1.009)        |
| Bipolar disorder                                                                                                                                                                                                                                    | 1.030 (0.958, 1.108)        | <b>1.190 (1.073, 1.319)</b> |
| Major depression                                                                                                                                                                                                                                    | <b>1.091 (1.024, 1.161)</b> | <b>1.158 (1.088, 1.232)</b> |
| Personality disorder                                                                                                                                                                                                                                | 0.923 (0.831, 1.026)        | 0.973 (0.836, 1.133)        |
| Attention deficit hyperactivity disorder                                                                                                                                                                                                            | 1.088 (0.979, 1.210)        | 0.937 (0.786, 1.116)        |
| Post-traumatic stress disorder                                                                                                                                                                                                                      | <b>1.227 (1.125, 1.338)</b> | 0.985 (0.850, 1.141)        |
| Schizophrenia or other psychotic disorder                                                                                                                                                                                                           | <b>0.824 (0.755, 0.900)</b> | 0.932 (0.794, 1.094)        |
| <b>Baseline Other Chronic Medical Conditions*</b>                                                                                                                                                                                                   |                             |                             |
| Cancer                                                                                                                                                                                                                                              | <b>0.882 (0.796, 0.978)</b> | <b>0.889 (0.817, 0.966)</b> |
| Diabetes                                                                                                                                                                                                                                            | <b>0.932 (0.875, 0.992)</b> | <b>0.926 (0.869, 0.986)</b> |
| Cardiovascular and other circulatory                                                                                                                                                                                                                | <b>0.806 (0.752, 0.864)</b> | <b>0.881 (0.816, 0.951)</b> |
| Chronic respiratory disease                                                                                                                                                                                                                         | <b>0.870 (0.819, 0.924)</b> | <b>0.862 (0.808, 0.919)</b> |
| Viral hepatitis                                                                                                                                                                                                                                     | <b>1.109 (1.013, 1.215)</b> | <b>1.175 (1.001, 1.379)</b> |
| HIV                                                                                                                                                                                                                                                 | 1.171 (0.972, 1.411)        | 1.095 (0.737, 1.628)        |
| Obesity                                                                                                                                                                                                                                             | <b>1.090 (1.026, 1.159)</b> | 0.979 (0.919, 1.042)        |
| Liver disease cirrhosis and other liver conditions <sup>±</sup>                                                                                                                                                                                     | <b>0.765 (0.703, 0.831)</b> | <b>0.834 (0.758, 0.917)</b> |
| Acute/Chronic Pain                                                                                                                                                                                                                                  | 1.085 (0.999, 1.177)        | 1.029 (0.923, 1.148)        |
| Bolded text represents statistically significant results                                                                                                                                                                                            |                             |                             |
| ‡Models adjusted for all variables in the table                                                                                                                                                                                                     |                             |                             |
| * Reference group is not having condition                                                                                                                                                                                                           |                             |                             |
| ± Excluding hepatitis                                                                                                                                                                                                                               |                             |                             |
| To enable mutually exclusive groups for the regression analysis, 27 beneficiaries (0.30% of beneficiaries receiving MOUD) who received both buprenorphine and ER naltrexone from pharmacies during the study period were excluded from the analysis |                             |                             |



**eTable 3.** Characteristics Associated With Receipt of Behavioral Health-Related Telehealth Services During Study Period Among Beneficiaries With OUD in the Pandemic Cohort by Dual Eligible Status

|                                                                 | <b>Dually Eligible Beneficiaries<br/>N=36,724</b> | <b>Non-Dually Eligible Beneficiaries<br/>N=33,773</b> |
|-----------------------------------------------------------------|---------------------------------------------------|-------------------------------------------------------|
|                                                                 | <b>Adjusted ORs'<br/>(95% CI)</b>                 | <b>Adjusted ORs'<br/>(95% CI)</b>                     |
| <b>Receipt of MOUD During Study Period</b>                      |                                                   |                                                       |
| No MOUD                                                         | Ref                                               | Ref                                                   |
| MOUD from OTP only                                              | <b>0.690 (0.622, 0.767)</b>                       | <b>0.542 (0.424, 0.694)</b>                           |
| MOUD from OTP and Pharmacy                                      | 1.341 (0.930, 1.933)                              | 1.398 (0.516, 3.788)                                  |
| ER Naltrexone from Pharmacy only                                | <b>1.445 (1.000, 2.088)</b>                       | 3.032 (0.967, 9.504)                                  |
| Buprenorphine from Pharmacy only                                | <b>2.016 (1.868, 2.177)</b>                       | <b>1.958 (1.769, 2.168)</b>                           |
| <b>Baseline Sex</b>                                             |                                                   |                                                       |
| Male                                                            | Ref                                               | Ref                                                   |
| Female                                                          | <b>1.244 (1.185, 1.305)</b>                       | <b>1.193 (1.134, 1.256)</b>                           |
| <b>Baseline Age Group</b>                                       |                                                   |                                                       |
| 18-44                                                           | Ref                                               | Ref                                                   |
| 45-64                                                           | 1.013 (0.948, 1.083)                              | 0.983 (0.830, 1.163)                                  |
| 65-74                                                           | 0.926 (0.855, 1.004)                              | <b>0.811 (0.686, 0.960)</b>                           |
| 75 or older                                                     | <b>0.801 (0.725, 0.885)</b>                       | <b>0.687 (0.578, 0.817)</b>                           |
| <b>Baseline Race/Ethnicity</b>                                  |                                                   |                                                       |
| Non-Hispanic White                                              | Ref                                               | Ref                                                   |
| Non-Hispanic African American                                   | <b>0.911 (0.852, 0.973)</b>                       | <b>0.888 (0.789, 1.000)</b>                           |
| Non-Hispanic American Indian or Alaska Native                   | 0.991 (0.819, 1.199)                              | 1.013 (0.726, 1.412)                                  |
| Non-Hispanic Asian or Pacific Islander                          | <b>1.294 (1.064, 1.575)</b>                       | 0.888 (0.649, 1.215)                                  |
| Non-Hispanic Other                                              | 1.145 (0.830, 1.580)                              | 0.948 (0.695, 1.293)                                  |
| Hispanic                                                        | 0.994 (0.916, 1.079)                              | 0.944 (0.818, 1.090)                                  |
| <b>Baseline U.S Census Region</b>                               |                                                   |                                                       |
| Northeast                                                       | Ref                                               | Ref                                                   |
| Midwest                                                         | <b>0.762 (0.600, 0.968)</b>                       | <b>0.675 (0.514, 0.886)</b>                           |
| South                                                           | <b>0.620 (0.498, 0.771)</b>                       | <b>0.660 (0.514, 0.849)</b>                           |
| West                                                            | <b>0.786 (0.621, 0.994)</b>                       | 0.811 (0.620, 1.060)                                  |
| <b>Baseline County Urban-Rural Status</b>                       |                                                   |                                                       |
| Metropolitan                                                    | Ref                                               | Ref                                                   |
| Micropolitan                                                    | <b>0.895 (0.842, 0.950)</b>                       | <b>0.850 (0.794, 0.909)</b>                           |
| Rural                                                           | <b>0.853 (0.734, 0.992)</b>                       | <b>0.697 (0.582, 0.835)</b>                           |
| <b>Time Spent in Nursing Home from Baseline to End of Study</b> |                                                   |                                                       |
| No time                                                         | Ref                                               | Ref                                                   |
| Quantile 1                                                      | <b>0.580 (0.506, 0.664)</b>                       | <b>0.751 (0.652, 0.865)</b>                           |
| Quantile 2                                                      | <b>0.776 (0.674, 0.894)</b>                       | <b>0.862 (0.754, 0.985)</b>                           |
| Quantile 3                                                      | <b>0.806 (0.713, 0.910)</b>                       | 0.891 (0.769, 1.033)                                  |
| Quantile 4                                                      | <b>0.840 (0.761, 0.928)</b>                       | 1.168 (0.882, 1.547)                                  |

|                                                                                                                                                                                                                                                     |                             |                             |
|-----------------------------------------------------------------------------------------------------------------------------------------------------------------------------------------------------------------------------------------------------|-----------------------------|-----------------------------|
| <b>Baseline Other Substance Use Disorder Diagnosis*</b>                                                                                                                                                                                             |                             |                             |
| Alcohol use disorder                                                                                                                                                                                                                                | <b>1.091 (1.017, 1.171)</b> | <b>1.103 (1.005, 1.210)</b> |
| Tobacco use disorder                                                                                                                                                                                                                                | <b>1.073 (1.021, 1.128)</b> | <b>1.069 (1.004, 1.139)</b> |
| Cannabis use disorder                                                                                                                                                                                                                               | 0.951 (0.879, 1.030)        | 1.022 (0.881, 1.185)        |
| Cocaine use disorder                                                                                                                                                                                                                                | 0.922 (0.834, 1.019)        | <b>0.611 (0.472, 0.791)</b> |
| Stimulant use disorder                                                                                                                                                                                                                              | <b>0.774 (0.705, 0.850)</b> | <b>0.747 (0.602, 0.926)</b> |
| Sedative/hypnotic disorder                                                                                                                                                                                                                          | <b>1.385 (1.266, 1.515)</b> | <b>1.457 (1.321, 1.608)</b> |
| Other psychoactive substance use disorder                                                                                                                                                                                                           | <b>0.927 (0.864, 0.995)</b> | 0.936 (0.835, 1.049)        |
| <b>Baseline Mental Health Diagnosis*</b>                                                                                                                                                                                                            |                             |                             |
| Anxiety                                                                                                                                                                                                                                             | <b>1.599 (1.515, 1.686)</b> | <b>1.547 (1.467, 1.631)</b> |
| Bipolar disorder                                                                                                                                                                                                                                    | <b>1.608 (1.514, 1.707)</b> | <b>1.840 (1.686, 2.009)</b> |
| Major depression                                                                                                                                                                                                                                    | <b>1.903 (1.808, 2.003)</b> | <b>2.055 (1.949, 2.167)</b> |
| Personality disorder                                                                                                                                                                                                                                | <b>1.109 (1.016, 1.211)</b> | <b>1.434 (1.262, 1.629)</b> |
| Attention deficit hyperactivity disorder                                                                                                                                                                                                            | <b>1.380 (1.257, 1.516)</b> | <b>1.585 (1.362, 1.845)</b> |
| Post-traumatic stress disorder                                                                                                                                                                                                                      | <b>1.553 (1.438, 1.678)</b> | <b>1.663 (1.463, 1.891)</b> |
| Schizophrenia or other psychotic disorder                                                                                                                                                                                                           | <b>1.385 (1.291, 1.485)</b> | <b>1.499 (1.312, 1.711)</b> |
| <b>Baseline Other Chronic Medical Conditions*</b>                                                                                                                                                                                                   |                             |                             |
| Cancer                                                                                                                                                                                                                                              | <b>0.885 (0.816, 0.960)</b> | <b>0.928 (0.865, 0.995)</b> |
| Diabetes                                                                                                                                                                                                                                            | 0.978 (0.929, 1.023)        | <b>0.937 (0.888, 0.989)</b> |
| Cardiovascular and other circulatory                                                                                                                                                                                                                | <b>0.871 (0.820, 0.925)</b> | <b>0.922 (0.862, 0.987)</b> |
| Chronic respiratory disease                                                                                                                                                                                                                         | 0.974 (0.927, 1.023)        | 0.951 (0.901, 1.004)        |
| Viral hepatitis                                                                                                                                                                                                                                     | <b>0.916 (0.850, 0.987)</b> | 0.995 (0.867, 1.143)        |
| HIV                                                                                                                                                                                                                                                 | <b>1.218 (1.043, 1.423)</b> | 1.187 (0.845, 1.668)        |
| Obesity                                                                                                                                                                                                                                             | <b>1.108 (1.054, 1.167)</b> | 1.005 (0.953, 1.060)        |
| Liver disease cirrhosis and other liver conditions <sup>±</sup>                                                                                                                                                                                     | <b>0.866 (0.812, 0.924)</b> | <b>0.892 (0.825, 0.964)</b> |
| Acute/Chronic Pain                                                                                                                                                                                                                                  | <b>1.097 (1.024, 1.177)</b> | <b>1.133 (1.028, 1.249)</b> |
| Bolded text represents statistically significant results                                                                                                                                                                                            |                             |                             |
| ‡Models adjusted for all variables in the table                                                                                                                                                                                                     |                             |                             |
| * Reference group is not having condition                                                                                                                                                                                                           |                             |                             |
| ± Excluding hepatitis                                                                                                                                                                                                                               |                             |                             |
| To enable mutually exclusive groups for the regression analysis, 27 beneficiaries (0.30% of beneficiaries receiving MOUD) who received both buprenorphine and ER naltrexone from pharmacies during the study period were excluded from the analysis |                             |                             |

**eTable 4.** Characteristics Associated With MOUD Retention for at Least 80% of Eligible Days During Study Period Among Beneficiaries With OUD in the Pandemic Cohort Receiving MOUD During the Study Period by Dual Eligible Status

|                                                                 | <b>Adjusted ORs<sup>†</sup><br/>(95% CI)<br/>Dually Eligible<br/>Beneficiaries<br/>N=6,441</b> | <b>Adjusted ORs<sup>†</sup><br/>(95% CI)<br/>Non-Dually Eligible<br/>Beneficiaries<br/>N=2,356</b> |
|-----------------------------------------------------------------|------------------------------------------------------------------------------------------------|----------------------------------------------------------------------------------------------------|
| <b>Receipt of OUD-Related Telehealth Service</b>                | <b>1.281 (1.127, 1.455)</b>                                                                    | <b>1.252 (1.024, 1.530)</b>                                                                        |
| <b>Receipt of MOUD During Study Period</b>                      |                                                                                                |                                                                                                    |
| MOUD from OTP only                                              | Ref                                                                                            | Ref                                                                                                |
| MOUD from OTP and Pharmacy                                      | <b>0.394 (0.264, 0.589)</b>                                                                    | <b>0.263 (0.072, 0.965)</b>                                                                        |
| ER Naltrexone from Pharmacy only                                | <b>0.168 (0.095, 0.295)</b>                                                                    | 1.059 (0.324, 3.463)                                                                               |
| Buprenorphine from Pharmacy only                                | <b>0.536 (0.468, 0.613)</b>                                                                    | <b>0.775 (0.601, 0.998)</b>                                                                        |
| <b>Baseline Sex</b>                                             |                                                                                                |                                                                                                    |
| Male                                                            | Ref                                                                                            | Ref                                                                                                |
| Female                                                          | 0.932 (0.833, 1.043)                                                                           | 0.840 (0.694, 1.018)                                                                               |
| <b>Baseline Age Group</b>                                       |                                                                                                |                                                                                                    |
| 18-44                                                           | Ref                                                                                            | Ref                                                                                                |
| 45-64                                                           | <b>1.151 (1.008, 1.315)</b>                                                                    | <b>1.610 (1.134, 2.285)</b>                                                                        |
| 65-74                                                           | 1.106 (0.920, 1.329)                                                                           | 1.276 (0.886, 1.839)                                                                               |
| 75 or older                                                     | 1.174 (0.799, 1.727)                                                                           | 0.816 (0.521, 1.279)                                                                               |
| <b>Baseline Race/Ethnicity</b>                                  |                                                                                                |                                                                                                    |
| Non-Hispanic White                                              | Ref                                                                                            | Ref                                                                                                |
| Non-Hispanic African American                                   | <b>0.659 (0.549, 0.792)</b>                                                                    | 0.885 (0.577, 1.359)                                                                               |
| Non-Hispanic American Indian or Alaska Native                   | 0.957 (0.588, 1.557)                                                                           | 0.740 (0.294, 1.862)                                                                               |
| Non-Hispanic Asian or Pacific Islander                          | 0.918 (0.497, 1.696)                                                                           | 0.947 (0.266, 3.376)                                                                               |
| Non-Hispanic Other                                              | 1.099 (0.453, 2.668)                                                                           | 0.146 (0.018, 1.164)                                                                               |
| Hispanic                                                        | 0.841 (0.681, 1.040)                                                                           | 0.713 (0.408, 1.245)                                                                               |
| <b>Baseline U.S Census Region</b>                               |                                                                                                |                                                                                                    |
| Northeast                                                       | Ref                                                                                            | Ref                                                                                                |
| Midwest                                                         | 0.914 (0.664, 1.258)                                                                           | 1.247 (0.901, 1.728)                                                                               |
| South                                                           | 0.953 (0.724, 1.253)                                                                           | 1.111 (0.842, 1.467)                                                                               |
| West                                                            | <b>0.726 (0.531, 0.992)</b>                                                                    | 0.847 (0.628, 1.143)                                                                               |
| <b>Baseline County Urban-Rural Status</b>                       |                                                                                                |                                                                                                    |
| Metropolitan                                                    | Ref                                                                                            | Ref                                                                                                |
| Micropolitan                                                    | 0.973 (0.843, 1.124)                                                                           | 0.922 (0.727, 1.169)                                                                               |
| Rural                                                           | 1.100 (0.769, 1.576)                                                                           | 0.731 (0.359, 1.487)                                                                               |
| <b>Time Spent in Nursing Home from Baseline to End of Study</b> |                                                                                                |                                                                                                    |
| No time                                                         | Ref                                                                                            | Ref                                                                                                |
| Quantile 1                                                      | <b>0.311 (0.155, 0.625)</b>                                                                    | <b>0.367 (0.139, 0.966)</b>                                                                        |
| Quantile 2                                                      | 0.631 (0.354, 1.124)                                                                           | 0.453 (0.171, 1.203)                                                                               |
| Quantile 3                                                      | <b>0.030 (0.004, 0.217)</b>                                                                    | omitted                                                                                            |

|                                                                                                                                                                                                                                                     |                             |                             |
|-----------------------------------------------------------------------------------------------------------------------------------------------------------------------------------------------------------------------------------------------------|-----------------------------|-----------------------------|
| Quantile 4                                                                                                                                                                                                                                          | <b>0.267 (0.102, 0.698)</b> | omitted                     |
| <b>Baseline Other Substance Use Disorder Diagnosis*</b>                                                                                                                                                                                             |                             |                             |
| Alcohol use disorder                                                                                                                                                                                                                                | <b>0.716 (0.598, 0.858)</b> | 0.785 (0.567, 1.087)        |
| Tobacco use disorder                                                                                                                                                                                                                                | 0.936 (0.833, 1.051)        | 1.038 (0.846, 1.275)        |
| Cannabis use disorder                                                                                                                                                                                                                               | <b>0.753 (0.614, 0.924)</b> | 0.815 (0.519, 1.279)        |
| Cocaine use disorder                                                                                                                                                                                                                                | <b>0.579 (0.447, 0.750)</b> | 0.534 (0.254, 1.123)        |
| Stimulant use disorder                                                                                                                                                                                                                              | <b>0.550 (0.441, 0.687)</b> | 0.635 (0.339, 1.189)        |
| Sedative/hypnotic disorder                                                                                                                                                                                                                          | 0.928 (0.728, 1.183)        | 0.765 (0.508, 1.151)        |
| Other psychoactive substance use disorder                                                                                                                                                                                                           | 0.907 (0.780, 1.056)        | <b>1.396 (1.036, 1.881)</b> |
| <b>Baseline Mental Health Diagnosis*</b>                                                                                                                                                                                                            |                             |                             |
| Anxiety                                                                                                                                                                                                                                             | 0.902 (0.791, 1.028)        | 0.915 (0.745, 1.124)        |
| Bipolar disorder                                                                                                                                                                                                                                    | 1.094 (0.948, 1.264)        | 0.816 (0.601, 1.108)        |
| Major depression                                                                                                                                                                                                                                    | 0.899 (0.794, 1.018)        | 0.946 (0.770, 1.162)        |
| Personality disorder                                                                                                                                                                                                                                | <b>0.618 (0.484, 0.789)</b> | 1.109 (0.702, 1.751)        |
| Attention deficit hyperactivity disorder                                                                                                                                                                                                            | 0.989 (0.805, 1.214)        | <b>0.596 (0.363, 0.977)</b> |
| Post-traumatic stress disorder                                                                                                                                                                                                                      | 1.062 (0.891, 1.267)        | 0.916 (0.609, 1.376)        |
| Schizophrenia or other psychotic disorder                                                                                                                                                                                                           | 0.858 (0.712, 1.034)        | <b>0.402 (0.235, 0.688)</b> |
| <b>Baseline Other Chronic Medical Conditions*</b>                                                                                                                                                                                                   |                             |                             |
| Cancer                                                                                                                                                                                                                                              | 0.837 (0.623, 1.124)        | <b>0.570 (0.394, 0.823)</b> |
| Diabetes                                                                                                                                                                                                                                            | 0.927 (0.804, 1.070)        | 0.897 (0.718, 1.120)        |
| Cardiovascular and other circulatory                                                                                                                                                                                                                | 0.926 (0.814, 1.055)        | <b>0.793 (0.640, 0.983)</b> |
| Chronic respiratory disease                                                                                                                                                                                                                         | <b>0.863 (0.756, 0.986)</b> | 0.857 (0.682, 1.076)        |
| Viral hepatitis                                                                                                                                                                                                                                     | 0.918 (0.786, 1.072)        | 0.713 (0.493, 1.030)        |
| HIV                                                                                                                                                                                                                                                 | 0.846 (0.579, 1.236)        | <b>0.345 (0.123, 0.969)</b> |
| Obesity                                                                                                                                                                                                                                             | 1.116 (0.975, 1.278)        | 1.125 (0.905, 1.399)        |
| Liver disease cirrhosis and other liver conditions <sup>±</sup>                                                                                                                                                                                     | 0.839 (0.696, 1.011)        | 0.767 (0.553, 1.064)        |
| Acute/Chronic Pain                                                                                                                                                                                                                                  | <b>0.869 (0.766, 0.987)</b> | <b>0.721 (0.570, 0.913)</b> |
| Bolded text represents statistically significant results                                                                                                                                                                                            |                             |                             |
| †Models adjusted for all variables in the table                                                                                                                                                                                                     |                             |                             |
| * Reference group is not having condition                                                                                                                                                                                                           |                             |                             |
| ± Excluding hepatitis                                                                                                                                                                                                                               |                             |                             |
| To enable mutually exclusive groups for the regression analysis, 27 beneficiaries (0.30% of beneficiaries receiving MOUD) who received both buprenorphine and ER naltrexone from pharmacies during the study period were excluded from the analysis |                             |                             |

**eTable 5.** Characteristics Associated With Experiencing Any Medically Treated Drug Overdose During Study Period Among Beneficiaries With OUD in the Pandemic Cohort by Dual Eligible Status

|                                                                 | <b>Adjusted ORs<sup>†</sup><br/>(95% CI)<br/>Dually Eligible<br/>Beneficiaries<br/>N=36,724</b> | <b>Adjusted ORs<sup>†</sup><br/>(95% CI)<br/>Non-Dually Eligible<br/>Beneficiaries<br/>N=33,773</b> |
|-----------------------------------------------------------------|-------------------------------------------------------------------------------------------------|-----------------------------------------------------------------------------------------------------|
| <b>Receipt of OUD-Related Telehealth Service</b>                | <b>0.672 (0.622, 0.726)</b>                                                                     | <b>0.674 (0.619, 0.734)</b>                                                                         |
| <b>Receipt of MOUD During Study Period</b>                      |                                                                                                 |                                                                                                     |
| No MOUD                                                         | Ref                                                                                             | Ref                                                                                                 |
| MOUD from OTP only                                              | <b>0.525 (0.446, 0.618)</b>                                                                     | <b>0.530 (0.359, 0.783)</b>                                                                         |
| MOUD from OTP and Pharmacy                                      | 1.409 (0.929, 2.137)                                                                            | 0.857 (0.235, 3.127)                                                                                |
| ER Naltrexone from Pharmacy only                                | 0.920 (0.626, 1.351)                                                                            | 0.711 (0.170, 2.972)                                                                                |
| Buprenorphine from Pharmacy only                                | <b>0.901 (0.817, 0.994)</b>                                                                     | 0.889 (0.774, 1.021)                                                                                |
| <b>Baseline Sex</b>                                             |                                                                                                 |                                                                                                     |
| Male                                                            | Ref                                                                                             | Ref                                                                                                 |
| Female                                                          | <b>1.075 (1.013, 1.141)</b>                                                                     | <b>1.071 (1.005, 1.142)</b>                                                                         |
| <b>Baseline Age Group</b>                                       |                                                                                                 |                                                                                                     |
| 18-44                                                           | Ref                                                                                             | Ref                                                                                                 |
| 45-64                                                           | <b>0.715 (0.660, 0.775)</b>                                                                     | <b>0.726 (0.591, 0.893)</b>                                                                         |
| 65-74                                                           | <b>0.738 (0.669, 0.813)</b>                                                                     | <b>0.720 (0.586, 0.885)</b>                                                                         |
| 75 or older                                                     | <b>0.656 (0.580, 0.741)</b>                                                                     | <b>0.678 (0.548, 0.839)</b>                                                                         |
| <b>Baseline Race/Ethnicity</b>                                  |                                                                                                 |                                                                                                     |
| Non-Hispanic White                                              | Ref                                                                                             | Ref                                                                                                 |
| Non-Hispanic African American                                   | <b>1.120 (1.035, 1.211)</b>                                                                     | 0.906 (0.781, 1.051)                                                                                |
| Non-Hispanic American Indian or Alaska Native                   | 0.934 (0.741, 1.176)                                                                            | 1.374 (0.946, 1.997)                                                                                |
| Non-Hispanic Asian or Pacific Islander                          | 1.043 (0.813, 1.339)                                                                            | <b>1.771 (1.252, 2.505)</b>                                                                         |
| Non-Hispanic Other                                              | 1.014 (0.680, 1.511)                                                                            | <b>1.670 (1.186, 2.351)</b>                                                                         |
| Hispanic                                                        | 0.913 (0.824, 1.012)                                                                            | 0.899 (0.743, 1.088)                                                                                |
| <b>Baseline U.S Census Region</b>                               |                                                                                                 |                                                                                                     |
| Northeast                                                       | Ref                                                                                             | Ref                                                                                                 |
| Midwest                                                         | 0.958 (0.825, 1.113)                                                                            | 1.071 (0.916, 1.252)                                                                                |
| South                                                           | <b>0.844 (0.737, 0.967)</b>                                                                     | 0.920 (0.799, 1.060)                                                                                |
| West                                                            | 0.995 (0.856, 1.156)                                                                            | 1.087 (0.933, 1.269)                                                                                |
| <b>Baseline County Urban-Rural Status</b>                       |                                                                                                 |                                                                                                     |
| Metropolitan                                                    | Ref                                                                                             | Ref                                                                                                 |
| Micropolitan                                                    | <b>0.886 (0.823, 0.953)</b>                                                                     | 0.948 (0.873, 1.030)                                                                                |
| Rural                                                           | 0.986 (0.819, 1.187)                                                                            | 1.087 (0.888, 1.331)                                                                                |
| <b>Time Spent in Nursing Home from Baseline to End of Study</b> |                                                                                                 |                                                                                                     |
| No time                                                         | Ref                                                                                             | Ref                                                                                                 |
| Quantile 1                                                      | <b>1.662 (1.448, 1.906)</b>                                                                     | <b>2.330 (2.030, 2.674)</b>                                                                         |
| Quantile 2                                                      | <b>1.626 (1.403, 1.883)</b>                                                                     | <b>1.698 (1.476, 1.954)</b>                                                                         |

|                                                                                                                                                                                                                                                     |                             |                             |
|-----------------------------------------------------------------------------------------------------------------------------------------------------------------------------------------------------------------------------------------------------|-----------------------------|-----------------------------|
| Quantile 3                                                                                                                                                                                                                                          | <b>1.652 (1.455, 1.875)</b> | <b>2.180 (1.877, 2.532)</b> |
| Quantile 4                                                                                                                                                                                                                                          | 1.109 (0.988, 1.245)        | 1.153 (0.832, 1.597)        |
| <b>Baseline Other Substance Use Disorder Diagnosis*</b>                                                                                                                                                                                             |                             |                             |
| Alcohol use disorder                                                                                                                                                                                                                                | <b>1.131 (1.047, 1.222)</b> | <b>1.286 (1.159, 1.428)</b> |
| Tobacco use disorder                                                                                                                                                                                                                                | <b>1.208 (1.136, 1.284)</b> | <b>1.149 (1.065, 1.240)</b> |
| Cannabis use disorder                                                                                                                                                                                                                               | <b>1.219 (1.119, 1.328)</b> | <b>1.311 (1.116, 1.539)</b> |
| Cocaine use disorder                                                                                                                                                                                                                                | <b>1.407 (1.269, 1.559)</b> | <b>1.666 (1.289, 2.155)</b> |
| Stimulant use disorder                                                                                                                                                                                                                              | <b>1.288 (1.166, 1.422)</b> | <b>1.440 (1.152, 1.800)</b> |
| Sedative/hypnotic disorder                                                                                                                                                                                                                          | <b>1.349 (1.225, 1.485)</b> | <b>1.254 (1.118, 1.407)</b> |
| Other psychoactive substance use disorder                                                                                                                                                                                                           | <b>1.823 (1.690, 1.967)</b> | <b>1.712 (1.515, 1.934)</b> |
| <b>Baseline Mental Health Diagnosis*</b>                                                                                                                                                                                                            |                             |                             |
| Anxiety                                                                                                                                                                                                                                             | <b>1.338 (1.249, 1.434)</b> | <b>1.421 (1.327, 1.521)</b> |
| Bipolar disorder                                                                                                                                                                                                                                    | <b>1.109 (1.034, 1.189)</b> | <b>1.237 (1.118, 1.369)</b> |
| Major depression                                                                                                                                                                                                                                    | <b>1.261 (1.181, 1.347)</b> | <b>1.332 (1.244, 1.426)</b> |
| Personality disorder                                                                                                                                                                                                                                | <b>1.233 (1.124, 1.353)</b> | 0.938 (0.807, 1.090)        |
| Attention deficit hyperactivity disorder                                                                                                                                                                                                            | 1.040 (0.939, 1.152)        | 0.915 (0.764, 1.097)        |
| Post-traumatic stress disorder                                                                                                                                                                                                                      | <b>0.905 (0.831, 0.986)</b> | 0.985 (0.852, 1.140)        |
| Schizophrenia or other psychotic disorder                                                                                                                                                                                                           | <b>1.083 (1.002, 1.171)</b> | <b>1.397 (1.214, 1.608)</b> |
| <b>Baseline Other Chronic Medical Conditions*</b>                                                                                                                                                                                                   |                             |                             |
| Cancer                                                                                                                                                                                                                                              | <b>1.801 (1.651, 1.964)</b> | <b>1.993 (1.847, 2.151)</b> |
| Diabetes                                                                                                                                                                                                                                            | <b>1.168 (1.099, 1.242)</b> | <b>1.154 (1.081, 1.232)</b> |
| Cardiovascular and other circulatory                                                                                                                                                                                                                | <b>1.444 (1.335, 1.561)</b> | <b>1.516 (1.373, 1.675)</b> |
| Chronic respiratory disease                                                                                                                                                                                                                         | <b>1.299 (1.225, 1.378)</b> | <b>1.419 (1.331, 1.514)</b> |
| Viral hepatitis                                                                                                                                                                                                                                     | 1.044 (0.960, 1.136)        | 1.079 (0.922, 1.263)        |
| HIV                                                                                                                                                                                                                                                 | 0.964 (0.804, 1.157)        | 0.887 (0.578, 1.363)        |
| Obesity                                                                                                                                                                                                                                             | <b>1.063 (1.001, 1.129)</b> | 1.058 (0.991, 1.130)        |
| Liver disease cirrhosis and other liver conditions <sup>±</sup>                                                                                                                                                                                     | <b>1.538 (1.434, 1.650)</b> | <b>1.624 (1.494, 1.766)</b> |
| Acute/Chronic Pain                                                                                                                                                                                                                                  | <b>1.233 (1.127, 1.349)</b> | <b>1.580 (1.370, 1.823)</b> |
| Bolded text represents statistically significant results                                                                                                                                                                                            |                             |                             |
| ‡Models adjusted for all variables in the table                                                                                                                                                                                                     |                             |                             |
| * Reference group is not having condition                                                                                                                                                                                                           |                             |                             |
| ± Excluding hepatitis                                                                                                                                                                                                                               |                             |                             |
| To enable mutually exclusive groups for the regression analysis, 27 beneficiaries (0.30% of beneficiaries receiving MOUD) who received both buprenorphine and ER naltrexone from pharmacies during the study period were excluded from the analysis |                             |                             |
